# Supplementary material
Source: PubMed Central journal article supplement (PMC3881430)
Supplement: NIHMS465176-supplement-01.pdf [file NIHMS465176-supplement-01.pdf]

## 7.4 *Supplementary figure*

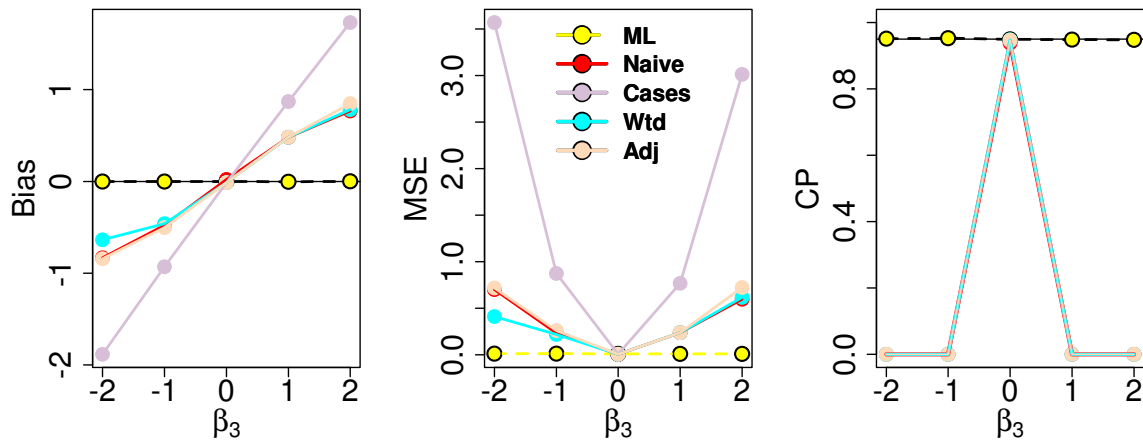

Figure 4: Performances of the naïve, cases-only (“Cases”), weighted (“Wtd”), and the adjusted (“Adj”) estimators compared to the ML estimator for binary secondary trait
